# Supplementary material for: Isorhamnetin Induces Cell Cycle Arrest and Apoptosis Via Reactive Oxygen Species-Mediated AMP-Activated Protein Kinase Signaling Pathway Activation in Human Bladder Cancer Cells
Source: PubMed Central journal article supplement (PMC6826535; doi:10.3390/cancers11101494), 2019-10-04

Figure 3-C

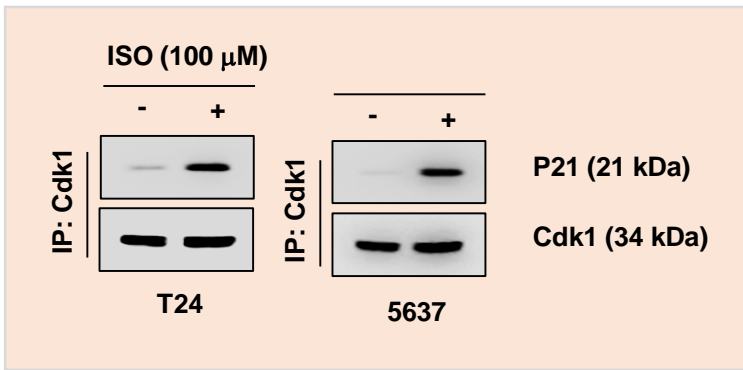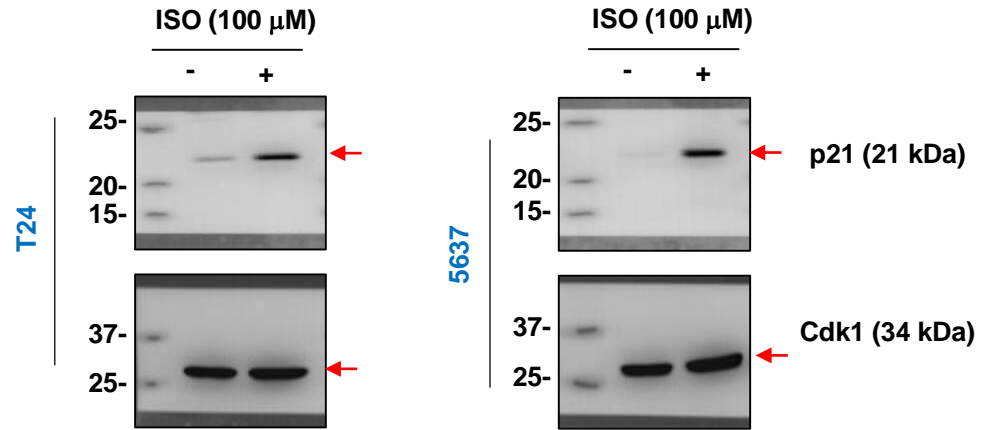

Figure 4-D : T24

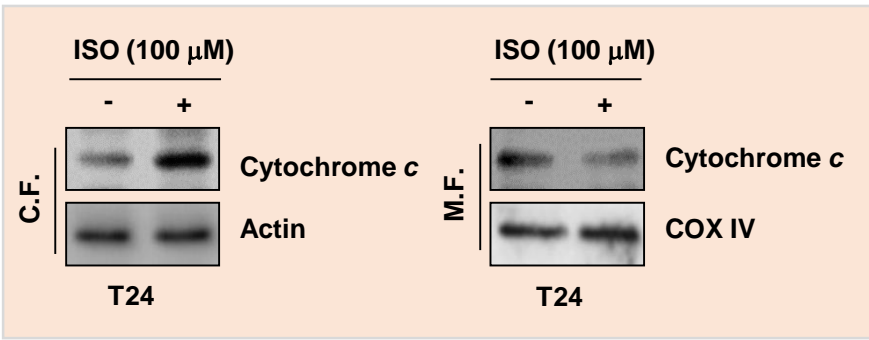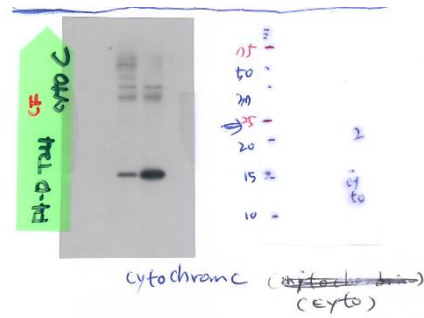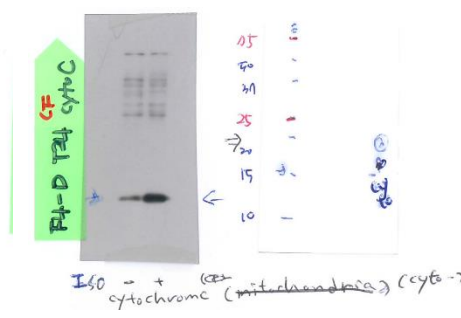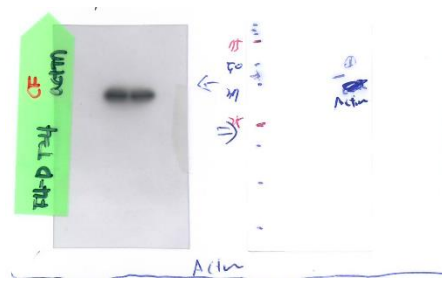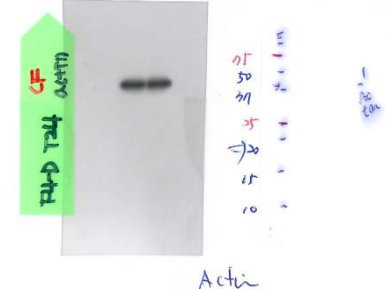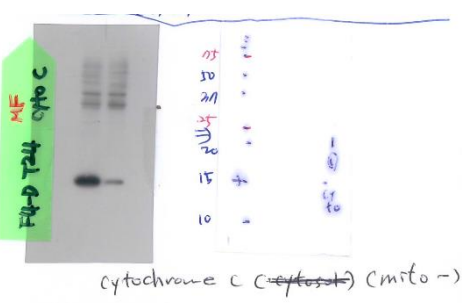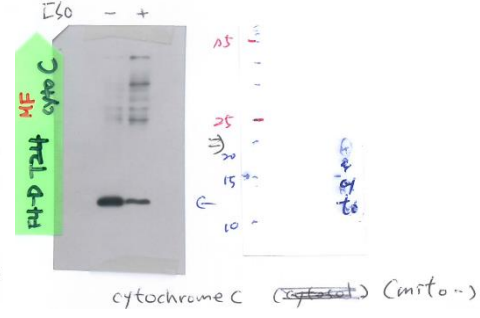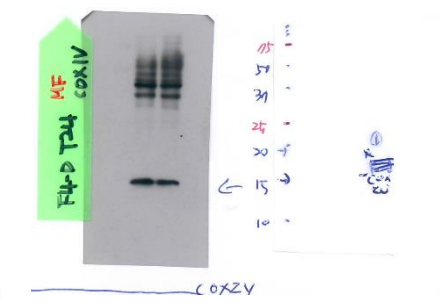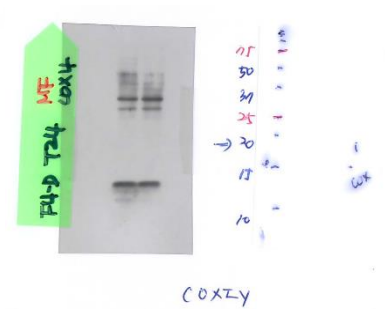

Figure 4-D : 5637

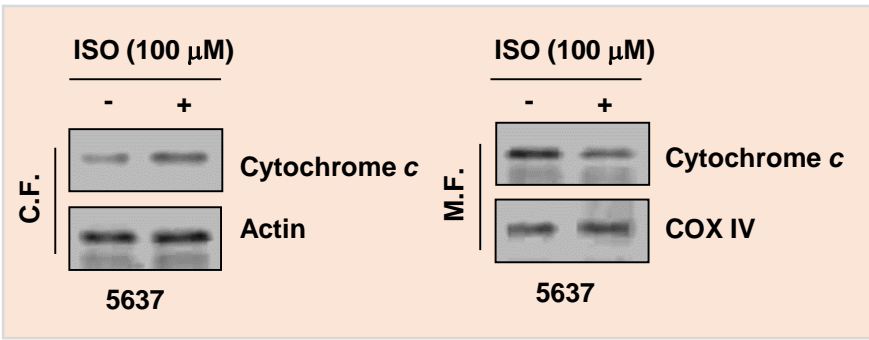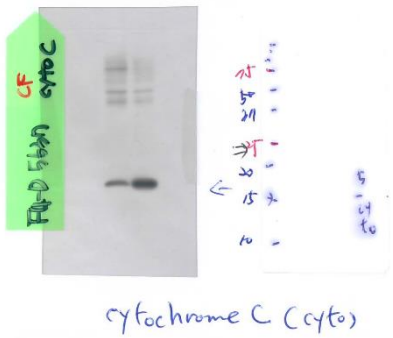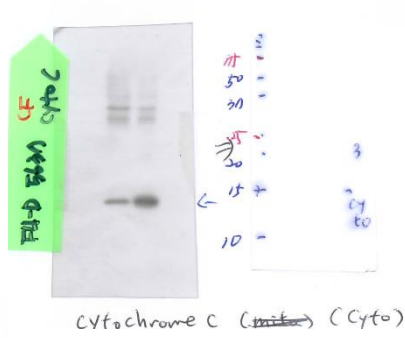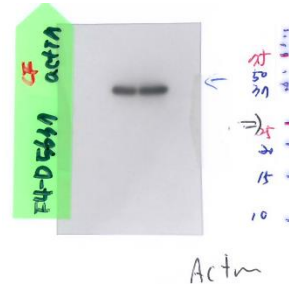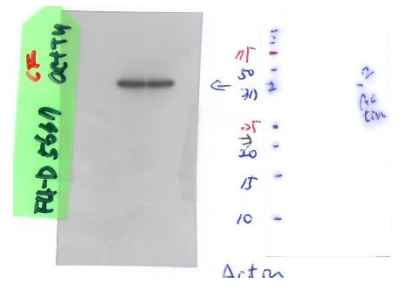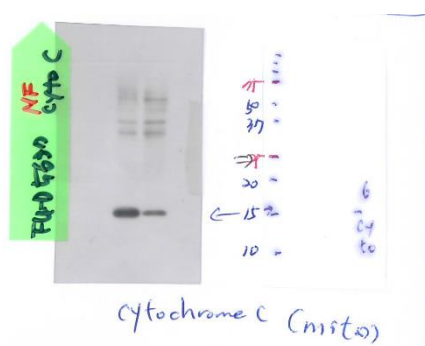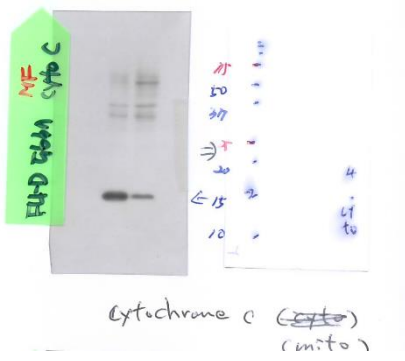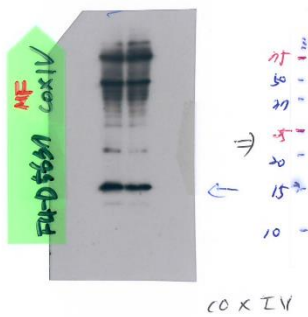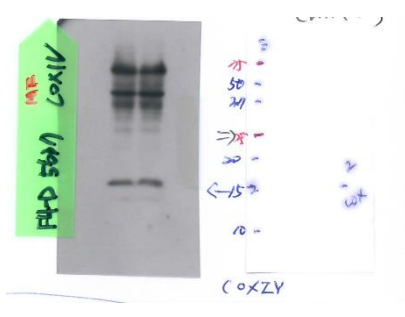

Supplement: cancers-11-01494-s001.pdf [file cancers-11-01494-s001.pdf]
